1 **Social network architecture and the tempo of cumulative cultural evolution**

2

3 Mauricio Cantor<sup>1,2,†,\*</sup>, Michael C. Chimento<sup>3,†</sup>, Simeon Q. Smeele<sup>3,4,†</sup>, Peng He<sup>5,6,7</sup>, Danai

4 Papageorgiou<sup>5,6,7</sup>, Lucy M. Aplin<sup>3,6,^,\*</sup>, Damien R. Farine<sup>5,6,7,^</sup>

5

6 <sup>1</sup> Department for the Ecology of Animal Societies, Max Planck Institute of Animal Behavior,  
7 Konstanz, Germany

8 <sup>2</sup> Departamento de Ecologia e Zoologia, Universidade Federal de Santa Catarina, Florianópolis,  
9 Brazil

10 <sup>3</sup> Cognitive & Cultural Ecology Research Group, Max Planck Institute of Animal Behavior,  
11 Radolfzell, Germany

12 <sup>4</sup> Department of Human Behavior, Ecology and Culture, Max Planck Institute for Evolutionary  
13 Anthropology, Leipzig, Germany

14 <sup>5</sup> Department of Collective Behaviour, Max Planck Institute of Animal Behavior, Konstanz,  
15 Germany

16 <sup>6</sup> Department of Biology, University of Konstanz, Konstanz, Germany

17 <sup>7</sup> Centre for the Advanced Study of Collective Behaviour, University of Konstanz, Konstanz,  
18 Germany

19 <sup>^</sup>Joint senior authors; <sup>†</sup>Joint first authors, arranged alphabetically

20

21 \* Corresponding Authors: Mauricio Cantor. Department for the Ecology of Animal Societies, Max  
22 Planck Institute of Animal Behavior, Am Obstberg 1, Radolfzell 78315, Germany; Lucy M. Aplin.  
23 Cognitive & Cultural Ecology Research Group, Max Planck Institute of Animal Behavior, Am  
24 Obstberg 1, Radolfzell 78315, Germany, Phone: +49 7732 1501-13. Email: [mcantor@ab.mpg.de](mailto:mcantor@ab.mpg.de),  
25 [laplin@ab.mpg.de](mailto:laplin@ab.mpg.de)

## 26 **Abstract**

27 The ability to build upon previous knowledge – cumulative cultural evolution (CCE) – is a  
28 hallmark of human societies. While CCE depends on the interaction between social systems,  
29 cognition and the environment, there is increasing evidence that CCE is facilitated by larger and  
30 more structured societies. However, the relative importance of social network architecture as an  
31 additional factor shaping CCE remains unclear. By simulating innovation and diffusion of cultural  
32 traits in populations with stereotyped social structures, we disentangle the relative contributions  
33 of network architecture from those of population size and connectivity. We demonstrate that while  
34 multilevel societies can promote the recombination of cultural traits into high-value products, they  
35 also hinder spread and make products more likely to go extinct. We find that transmission  
36 mechanisms are therefore critical in determining the outcomes of CCE. Our results highlight the  
37 complex interaction between population size, structure and transmission mechanisms, with  
38 important implications for future research.

39

## 40 **Keywords**

41 Cultural evolution | Cultural complexity | Multilevel societies | Small-world networks | Social  
42 structure

43

## 44 **Introduction**

45

46 Cumulative cultural evolution – where iterative innovations and social transmission generate  
47 cultural accumulation over time [1-3] – is key to the human’s ecological success and worldwide  
48 distribution [4,5]. While CCE fundamentally depends on the interplay between cognition and  
49 social learning mechanisms [1], it is increasingly clear that demography can modulate the rate of  
50 cultural evolution [6-9]. Large population sizes [10,11], greater population turnover, and more  
51 densely connected societies [3,12] can all provide greater innovative potential, more learning  
52 models, faster diffusion, and reduced extinction risk of useful innovations [7,13-15]. For example,  
53 increasing population density as well as migration of hunter-gatherers during the upper  
54 Paleolithic transition led to the explosion of culture that forms the basis of modern human

55 societies [8,15]. Yet, it remains unclear how variation in the wiring of these social connections  
56 shape the tempo of cumulative cultural evolution.

57

58 Network architecture – here defined as a social structure with a characteristic set of properties –  
59 can shape transmission of behaviours, thus setting the tempo of CCE – here defined as the rate of  
60 cultural recombination events. For example, architectures with low network connectivity (i.e.  
61 density; proportion of realised connections), high clustering (tendency of connected individuals to  
62 share the same social neighbours) and high modularity (tendency of the network to contain sets of  
63 individuals more connected to each other than with others) slow down the spread of information  
64 across populations [16-18]. Slower spread can then potentially favour greater cultural diversity by  
65 allowing multiple cultural lineages to arise in populations before any one lineage dominates  
66 [19,20]. While previous work has largely focused on how new behaviours spread through a social  
67 network [16,17] to establish cultures [20,21] and how cultural traits can generate a feedback  
68 shaping network structure [18,22], more recently it has been argued that emergent network  
69 properties could affect CCE [12,14,19] by shaping how new traits are produced, recombined, and  
70 maintained [14]. For example, partial connectivity facilitates the emergence of multiple cultural  
71 lineages in parallel [20], which is required for achieving cultural accumulation, but partially-  
72 connected networks suffer from cultural loss if connectivity is too low for new innovations to  
73 spread [14]. By contrast, full connectivity facilitates rapid spread of new innovations, but can  
74 prevent the accumulation of alternative cultural traits [12,14]. However, within a given level of  
75 connectivity, how connections are structured – the social network architecture – could also impact  
76 CCE by influencing how fast and widely information can spread.

77

78 Because network architecture can shape the effect of connectivity on diffusion dynamics [23], those  
79 architectures that balance the ability for cultural accumulation together with the recombination of  
80 different cultural traits should have a selective advantage in facilitating CCE [19]. Multilevel  
81 societies, such as those in modern hunter-gatherers, feature high clustering and nested modularity.  
82 These network properties are expected to favour CCE by allowing coexistence of multiple cultural  
83 traits in different parts of the network, and for different cultural lineages to come into contact to  
84 allow combinations from lineages to produce new traits [19]. Multilevel societies have been

85 demonstrated to accelerate CCE when compared to fully connected networks [19]. However, when  
86 considering their potential for facilitating CCE, multilevel and fully-connected networks represent  
87 possible endpoints along a continuum of possible architectures. Here, we ask how a range of social  
88 network architectures can affect the tempo of CCE within a given population size and number, or  
89 density, of social connections within that population. Our approach allows us to explicitly  
90 disentangle the relative contribution of network architecture from those of connectivity and  
91 population size.

92

### 93 **Results**

94

95 We generated networks with six different architectures—random, small-world, lattice, modular,  
96 modular lattice, and multilevel—capturing different levels and combinations of clustering and  
97 modularity (**Fig. 1A**). We expressed these network architectures in populations with different sizes  
98 and densities of connections (average degree), where all individuals in the network had the same  
99 degree. We then used the agent-based model implemented by Migliano et al. [19] (hereafter model  
100 1), inspired by the experiment of Derex & Boyd [12], to explore how network architecture affects  
101 time to cultural recombination (i.e. tempo) and the diversity of cultural traits. Briefly, this model  
102 allows innovations of cultural products to take place along two cultural lineages, with the  
103 knowledge of new products being spread to all social connections (one-to-many diffusion). Once a

104 high level of product diversity has been reached in both lineages, agents can recombine each  
 105 lineage's products into one with a final higher payoff product (hereafter 'recombination').  
 106

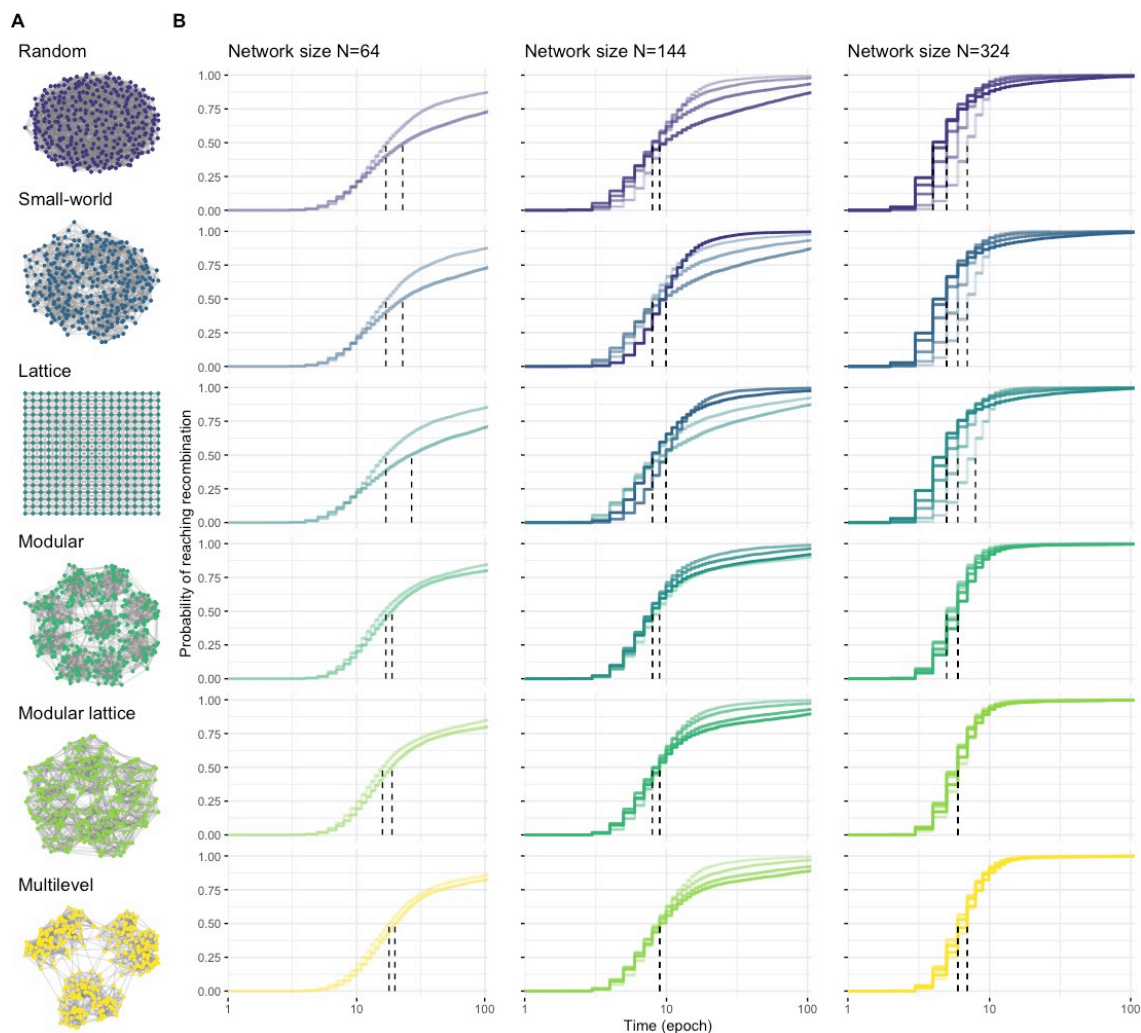

107

108 **Figure 1. Social network architectures, and the time to recombination for each architecture across**  
 109 **population sizes and levels of connectivity using model 1. (A)** Network architectures vary in  
 110 clustering and modularity: Random (unclustered  $C=0.03$ , non-modular  $Q=0.24$ ), small-world (clustered  
 111  $C=0.52$ , medium-modular  $Q=0.63$ ), lattice (clustered  $C=0.45$ , medium-modular  $Q=0.54$ ), modular  
 112 (unclustered  $C=0.23$ , modular  $Q=0.82$ ), modular lattices (clustered  $C=0.41$ , modular  $Q=0.81$ ), multilevel  
 113 (clustered  $C=0.42$ , modular  $Q=0.83$ ). Each binary network depicts populations with the same number of  
 114 individuals (here,  $N=324$  nodes) that have the same number of social connections (here, degree  $K=12$   
 115 links per node; density  $D=0.037$ ) but are wired differently. **(B)** Cumulative incidence of recombination  
 116 events (y-axis) as a stepwise function over time (x-axis, log epochs) for small ( $N=64$ ), medium ( $N=144$ ),  
 117 and large population sizes ( $N=324$ ). The line shading represents the amount of network connectivity  
 118 (node degree  $K$ , where the lighter the shade, the smaller the degree ( $K \in \{8,12\}$  for  $N=64$ ;  $K \in \{8,12,18,24\}$   
 119 for  $N=144$ ;  $K \in \{8,12,18,24,30\}$  for  $N=324$ ). Vertical dashed lines indicate the median of time to

120 recombination ( $S(t) \leq 0.5$ ) per network connectivity, across architectures. The time to reach recombination  
121 was truncated to 100 epochs for better visualization. Curves were calculated based on 5,000  
122

123 *Confirming the effects of population size and connectivity on CCE*

124

125 When comparing time to recombination, we confirm that partially connected networks  
126 outperform fully connected networks [12,14,19] (**Fig. 2A**). A generalized linear model indicated  
127 that overall fully connected networks were, on average, 65% slower (GLM,  $\exp(\beta)=1.652$ ,  $t=59.208$ ,  
128  $p<.001$ ; **Table S1**) compared to the least structured network architecture of the same size (random,  
129  $N=64$  taken as the intercept), with similar decreases in performance independent of size. Further,  
130 we also confirm [7] that larger populations take less time (about 40% less) to reach recombination  
131 (GLM,  $\exp(\beta)=0.618$ ,  $t=-68.481$ ,  $p<.001$ ) compared to networks of the same architecture and  
132 connectivity (**Figs. 1B,2, Table S2**). Larger partially-connected network architectures were less  
133 variable in their time to recombination (Quartile Coefficient of Dispersion:  $QCD=0.688$  for  $N=64$ ;  
134  $QCD=0.444$  for  $N=144$ ;  $QCD=0.273$  for  $N=324$ , **Fig. 2A**). We also found that time to recombination  
135 was optimized at intermediate densities of connections, confirming that intermediate levels of  
136 connectivity can favour CCE [14], and revealing that the optimal level of connectivity varied with  
137 population size (**Fig. 1B**). In the smallest population ( $N=64$ ), sparse networks outperformed the  
138 others, but this was reversed in the largest population ( $N=328$ ) (**Fig. 1B**). However, differences in  
139 time to recombination were generally small (**Fig. 1B, 2A**).  
140 simulations.

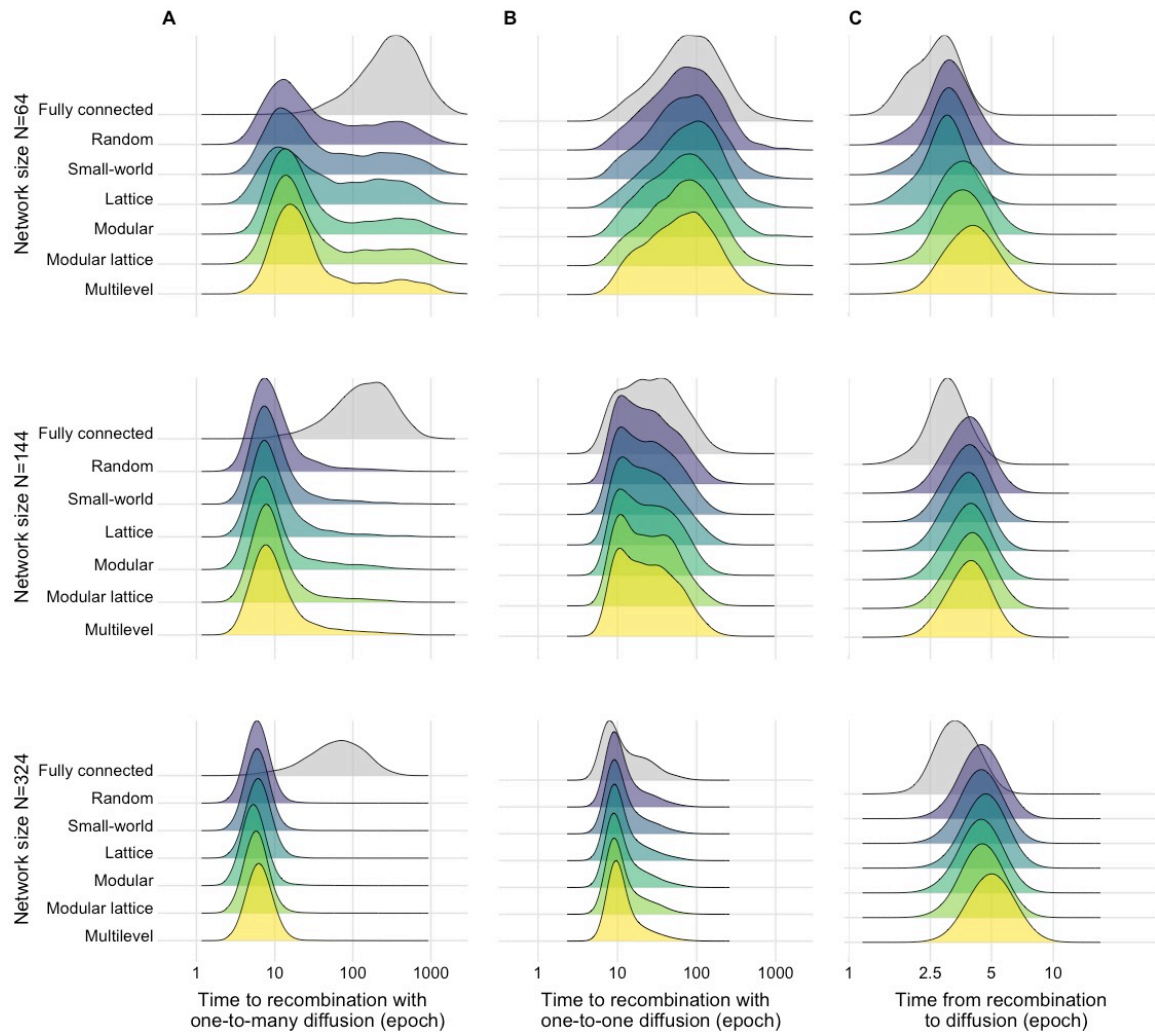

141

142 **Figure 2. Time to recombination and time from recombination to diffusion across network**  
 143 **architectures with varying sizes but a fixed degree.** Comparison of the performance across the range of  
 144 network architectures of the same degree (here  $K=12$  link per node) and fully connected networks of the same size ( $N=64$ ,  $N=144$ , and  $N=324$  nodes,  $K=63$ ,  $143$ , and  $323$  respectively). **(A)** Time to recombination  
 146 (log epochs) from 5,000 simulations with model 1 that uses a broadcast (one-to-many) diffusion  
 147 dynamic. **(B)** Time to recombination (log epochs) from 5,000 simulations with model 2 that uses a  
 148 dyadic (one-to-one) diffusion dynamic. **(C)** Difference between the time to recombination and the time  
 149 to diffusion, where time to diffusion corresponds to the latency until the majority of the individuals in  
 150 the population has information about the final higher-payoff product, from 5,000 simulations using  
 151 model 2 (one-to-one diffusion). All ridges were plotted with the same bandwidth (0.18).  
 152



153 *Architectures favouring CCE under some conditions disfavour CCE under other conditions*

154

155 Under the one-to-many diffusion mechanism (model 1), multilevel, modular, and modular lattice  
156 architectures had relatively shorter times to recombination in smaller populations with greater  
157 connectivity and in larger populations with less connectivity (**Fig. 3A**). However, such network  
158 architectures performed worse than lattice, small world, and random architectures in smaller  
159 populations with less connectivity and in larger populations with greater connectivity (**Fig. 3A**).  
160 Multilevel, modular, and modular lattice architectures were optimal at lower and higher levels of  
161 connectivity in medium-sized populations (N=144, **Fig. 3A**), although connectivity generally had a  
162 lesser impact for these architectures relative to random, small-world, and lattice architectures (**Fig.**  
163 **1B**). Surprisingly, multilevel performed the worst in seven out of the 11 size and connectivity  
164 combinations (**Fig. 3A**) despite having the highest clustering and modularity – properties that  
165 have been predicted to favour CCE [19]. The modular lattice architecture (which had similar  
166 modularity and clustering to multilevel architecture) performed best in the other four  
167 combinations (**Fig. 3A**). Thus, no one network architecture proved optimal, with those favoured  
168 under some conditions being disfavoured under other conditions.

169

170 The large variation in the time to recombination (**Fig. 2**) within a given combination of network  
171 architecture, population size, and density of connections suggests that the outcomes of a  
172 simulation were predominantly driven by stochastic events. The impact of such stochasticity is  
173 best revealed by the bimodal outcome for partially connected networks, which arises most often in  
174 smaller populations (**Fig. 2A**). This bimodality occurs because there are fewer independent  
175 innovation events when there are fewer individuals, which increases the chance that cultural  
176 products all emerge from the same lineage and, therefore, that this single lineage spreads to the  
177 whole population before the other lineage is innovated. Tracking the diversity of products over  
178 time (**Figs. 4,S1**) highlights how the stochasticity in early events can affect cultural diversity, and  
179 therefore the outcomes of CCE, even within the same network architecture. Overall, measuring the  
180 tempo of CCE under one-to-many diffusion (model 1) revealed differences in the best performing  
181 architecture across population sizes and levels of connectivity (**Fig. 2A,3A**); however, these



182 between-architecture differences were small (range = 0.886-1.145; **Fig. 3A**), compared to the large  
 183 variance in the time to recombination within architecture (**Fig. 2A**).  
 184

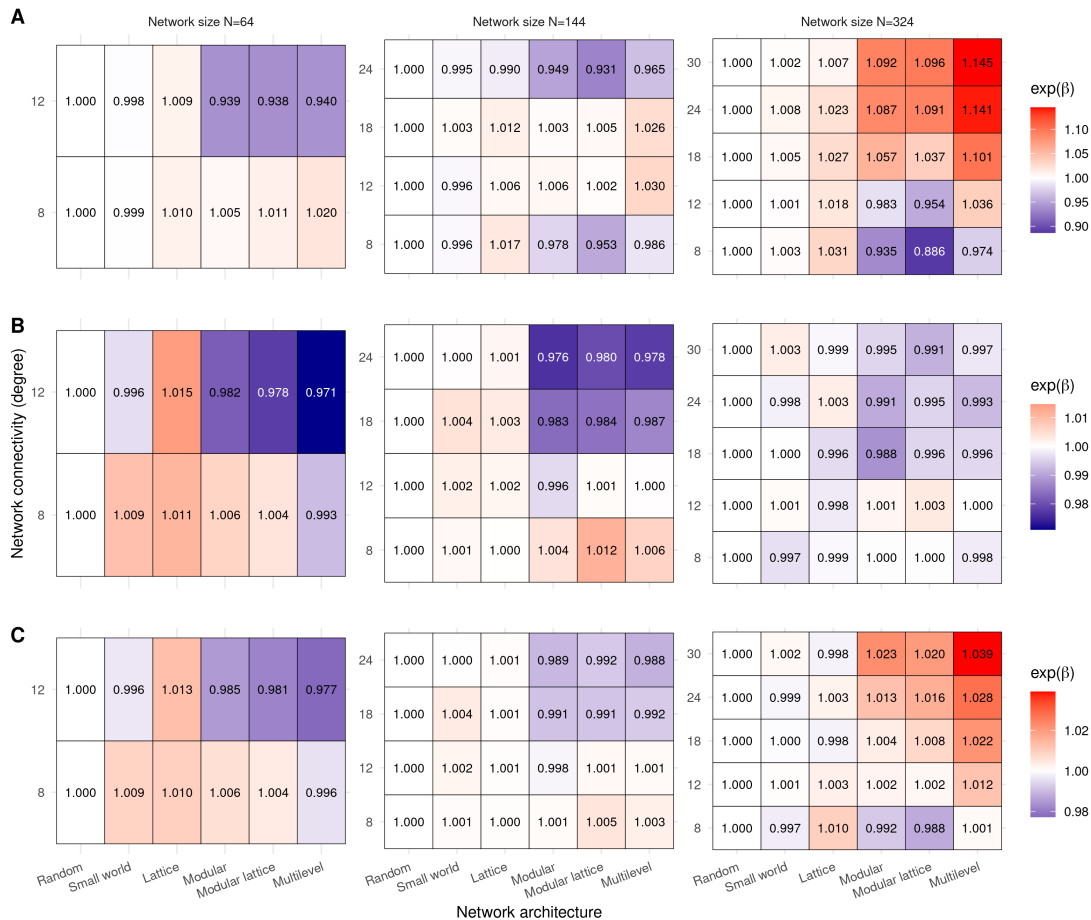

185 **Figure 3. Relative performance of network architectures within each of the 11 combinations of**  
 186 **population size and level of connectivity used in the simulations.** Each row of each table reports the  
 187 coefficient estimate of GLMs of network architecture (column) in function of the time to recombination  
 188 while maintaining degree (row) and network size (box) constant. Red colours (higher coefficients)  
 189 represent a poorer performance (longer latency to recombination) while blue colours represent  
 190 architecture that perform better (shorter latency to recombination) for that combination of population  
 191 size and level of connectivity (using random networks as the reference architecture in the GLM  
 192 intercept). The relative performance of each architecture is shown for **(A)** time to recombination under a  
 193 one-to-many diffusion mechanism (model 1), **(B)** time to recombination under a one-to-one diffusion  
 194 mechanism (model 2), and **(C)** total time to diffusion (from simulation start until the majority of the  
 195 population has information about the final higher-payoff product) under a one-to-one diffusion  
 196 mechanism (model 2).  
 197

198 *Diffusion mechanisms modify the contribution of network architecture, population size and connectivity on*  
 199 *CCE*

200

201 To identify the relative contribution of diffusion mechanisms to CCE, we extended model 1 by

202 implementing a one-to-one diffusion mechanism (hereafter model 2). Whereas model 1 represents

203 an extreme scenario where information spreads instantaneously to all the contacts of a focal agent,  
204 model 2 tests another extreme in which information about discoveries spread only to a single  
205 contact at a time. Interestingly, when employing such one-to-one diffusion dynamics, fully  
206 connected networks were only estimated to be 3% slower to recombination compared to networks  
207 of the same population size (GLM,  $\exp(\beta)=1.033$ ,  $t=6.808$ ,  $p<.001$ ; **Table. S1**). Again, larger  
208 populations had a significantly shorter average time to recombination compared to smaller  
209 networks of the same architecture and degree (GLM,  $\exp(\beta)=0.595$ ,  $t=-109.094$ ,  $p<.001$ ; **Fig. 2B**,  
210 **Table. S2**). However, under one-to-one diffusion, the relative times to recombination of different  
211 architectures was generally more consistent than under one-to-many diffusion, both in their  
212 median times to recombination (**Fig. 2B**) and in their relative performance under a given  
213 population size and level of connectivity (**Fig. 3B**). Within a given population size, multilevel  
214 architecture typically had the shortest times to recombination when networks had greater  
215 connectivity, but there was almost no difference in performance among architectures when  
216 connectivity was low (**Fig. 3B**). Thus, in contrast to one-to-many, one-to-one diffusion increased  
217 the tempo for architectures with greater modularity and clustering (modular, modular lattice,  
218 multilevel) relative to the other architectures.

219

220 Model 2 also tracked the time for the recombination product to diffuse to the majority of the  
221 population, something which model 1 was not designed to track. The time from recombination to  
222 diffusion was shortest in fully connected networks, and increased with population size (**Fig. 2C**).  
223 When evaluating performance from the start of the simulations until the time to diffusion,  
224 population size was the main contributor to differences in outcomes (**Fig. S5**). In small  
225 populations, the contribution of the final diffusion was relatively small compared to the time to  
226 recombination, meaning that the best performing networks in achieving recombination also  
227 performed best overall (**Fig. 3C**). By contrast, in larger populations, the performance of modular  
228 and clustered network architectures (modular, modular lattice, and multilevel) all performed  
229 worse: they were the slowest at reaching final diffusion (**Fig. 3C**) despite typically reaching

230 recombination the fastest (**Fig. 3B**). These differences, however, remain minor relative to the  
 231 variance in outcomes within each set of conditions (architecture, population size and connectivity).  
 232

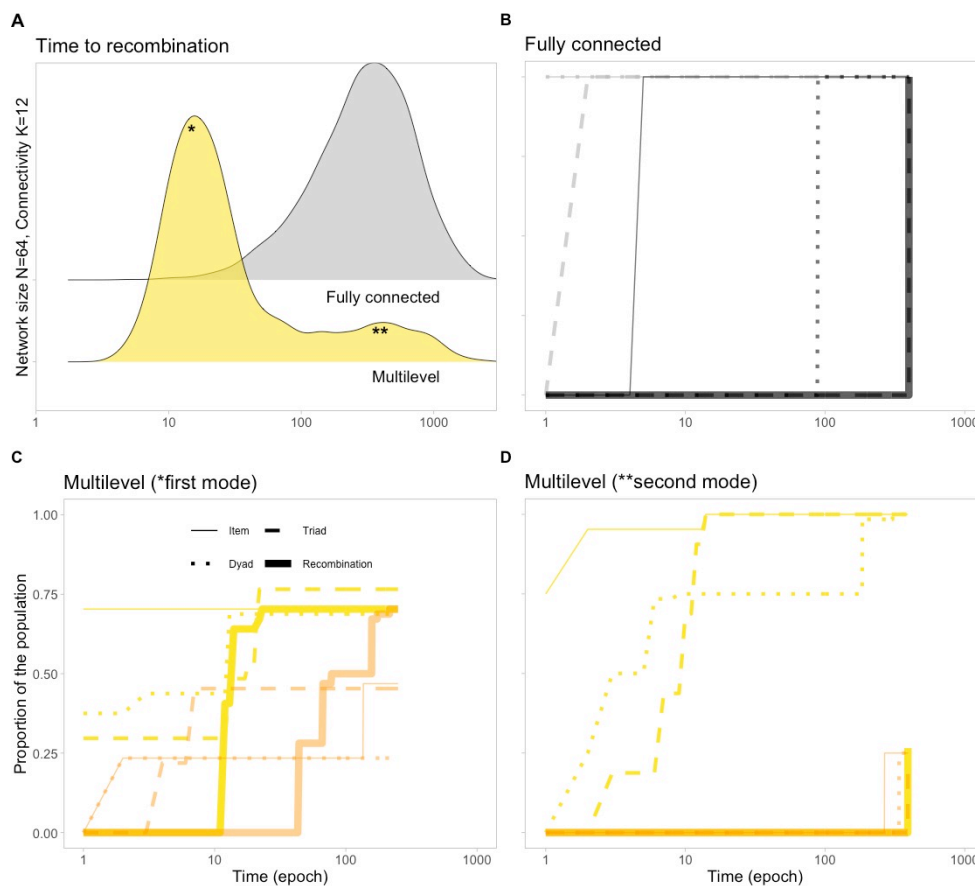

233

234 **Figure 4. Cultural product diversity across time in a fully connected network and a highly structured**  
 235 **social network architecture illustrates how early stochasticity shapes cultural outcomes.** (A) Time to  
 236 recombination (epochs) from 5,000 simulations with one-to-many diffusion dynamics (model 1) in  
 237 multilevel and fully-connected networks (with N=64 and K=12). Following panels show cultural  
 238 diversity over time from one simulation taken from the (B) from the mode of the fully-connected  
 239 network, and the (C) first (\*) and (D) second (\*\*) modes of the distribution of results from the multilevel  
 240 architecture. Cultural diversity represents the proportion of the population with one of the four possible  
 241 products over time, from two independent lineages (light and dark shades): a single inventory item (1st  
 242 stage; thin lines), a combination of two items (2nd stage; dotted lines), a valid combination triad of items  
 243 (3rd stage; dashed lines), and the final higher payoff product, i.e. a triad recombining products from the  
 244 two lineages (recombination; thick full lines).

245

## 246 Discussion

247

248 We revisit recent empirical and *in silico* experiments in humans to tease apart the contributions of  
 249 different candidate social structures to the tempo of cumulative cultural evolution. Our results  
 250 suggest that it is unlikely that one specific social network architecture consistently promotes CCE

251 across all population sizes, densities of social connections, or diffusion mechanisms. Rather, the  
252 relationship is nuanced; the broad distribution of outcomes from our two models indicate that the  
253 best performing architecture under some conditions can be the worst performing architecture  
254 under others. Further, the outcome of any diffusion mechanism is as likely to be affected by  
255 stochastic processes as by the architecture of the networks itself. While not at odds with previous  
256 work showing that multilevel societies can accelerate CCE [19], our results suggest that a range of  
257 other partially connected architectures could equally increase the tempo of CCE.

258

259 The fact that alternative architectures can have similar outcomes in terms of CCE has important  
260 consequences for how the social structure of societies and CCE are framed in future discussions,  
261 and where future research is directed. Current thinking is that complex, highly structured  
262 societies, such as multilevel societies, might precede recombinatory CCE in the timeline of human  
263 evolution, or that the benefits accrued from cultural evolution [22] or CCE [19] might co-evolve  
264 with clustered and modular network structures. However, our results suggest that simple patterns  
265 of spatial distribution (e.g. a lattice social network caused by distributed resources) could lead to  
266 largely equivalent effects on CCE. It follows that we might expect to find recombinatory CCE even  
267 before the evolution of complex societies. Indeed, evidence that simple, lattice-like social  
268 structures [24] can provide a substrate for recombinatorial culture might be provided by the  
269 combinatorial, spatially variable song structure of territorial passerine birds [25-29], which several  
270 authors have proposed to be a simple form of CCE [30,31].

271

272 Population size has been suggested as another major demographic factor affecting rates of CCE  
273 [3,7-9]. Our findings confirm this previous research, with our simulations showing that larger  
274 populations always have a higher rate of cultural accumulation. Population size also interacted  
275 with connectivity (which we modelled as a fixed network degree, i.e. the number of individuals'  
276 social connections [22]), with changes in connectivity having a more pronounced effect in smaller  
277 populations. This outcome is likely to arise because an increase in one unit of mean degree  
278 corresponds to a greater increase in network connectivity in smaller populations (more rapidly  
279 pushing the network towards becoming fully connected). However, in our simulations we did not  
280 vary the distribution in connectivity among individuals, which has previously been shown to

281 impact the properties of information cascades [32] and differences among groups in behaviours  
282 such as cooperation [33]. Skewed degree distributions, where some nodes are much more  
283 connected than others, could allow independent lineages to arise in peripheral nodes and for  
284 highly connected 'hubs' to combine the products from these lineages, thereby facilitating CCE.  
285 Thus, variation in how much or how little individuals are connected, independently of other  
286 factors (mean connectivity, population size, and network properties), is an important dimension  
287 for future studies on CCE to consider.

288

289 Fully connected networks have been commonly used to evaluate the performance of a  
290 transmission network with a given set of characteristics [3,19]. Our simulations demonstrate that  
291 the contribution of large differences in connectivity outweighs any effects pertaining to  
292 architecture, at least when information is broadcast (i.e. a one-to-many diffusion mechanism).  
293 Further, for most human societies, a fully-connected social network for a population of any  
294 reasonable size would correspond with an unrealistically high level of connectivity [34], even in  
295 the higher levels of the fractal-like human social networks [35]. Thus, we suggest that fully  
296 connected networks are uninformative null models for testing the influence of social structure on  
297 rates of CCE. Instead, random networks of similar sizes and densities of connections as a given  
298 network of interest would provide a more robust benchmark for comparing the performance of its  
299 architecture. Our results suggest, however, that any effect of network architecture on increased  
300 rate of CCE inferred from noisy field data would likely be indistinguishable from the null  
301 expectancy, as variation within architecture greatly exceeded that between architectures.

302

303 The evolutionary benefits of CCE not only rely on cultural accumulation, but also on the ability for  
304 new cultural traits to spread through populations. When we extended simulations to examine the  
305 time from recombination to the diffusion of the final higher payoff product, our results suggested  
306 that the network architecture hypothesized to improve time to recombination performance  
307 paradoxically inhibited diffusion most. These findings complement and extend the previous study  
308 by Derex et al. [12] demonstrating that populations with partially-connected network structures  
309 can suffer from cultural loss when connectivity becomes too low for new innovations to spread.  
310 Further, the relative performance of architectures can change dramatically when considering

311 performance in terms of acquisition of behaviour by the majority of nodes in a network, as  
312 opposed to the time when a single node has reached recombination, especially in larger  
313 populations. For example, while multilevel architecture consistently reached recombination faster  
314 than random networks under one-to-one diffusion, this architecture then restricted the final  
315 spread of higher-value cultural traits. Our results therefore suggest that multiple dimensions of  
316 performance – including every step from innovations to the final acquisition of higher-valued  
317 traits – may need to be considered when studying the role of social structure in shaping CCE and  
318 vice-versa.

319

320 Our work reinforces the need for studies of CCE to explicitly consider how network structure  
321 interacts with transmission mechanisms to form a realised transmission network. We show that a  
322 very restrictive transmission dynamics (one-to-one) mitigates the effect of network connectivity on  
323 CCE by generating a partially connected transmission network within an otherwise fully-  
324 connected social network. The consequences of transmission dynamics on CCE were  
325 demonstrated, for instance, by Migliano et al. [19] who found that CCE was faster in simulations  
326 where transmission was limited to kin-based connections (i.e. reduced connectivity). Under one-  
327 to-one diffusion, independent lineages can develop in fully-connected networks because new  
328 information is not immediately accessible to all, leading to more comparable performance between  
329 fully and partially connected networks. Thus, when simulating CCE, it is important to match the  
330 transmission dynamics with the time scale of the model. One-to-many diffusion can be realistic  
331 when each epoch represents one generation (e.g. the innovation of a new medicine [19] could take  
332 tens or hundreds of epochs to reach high recombinatory levels), while the one-to-one diffusion  
333 might be more realistic when cultural traits are simpler to recombine. The production and  
334 innovation frequency, as well as transmission biases, may further vary between species,  
335 populations, tasks and contexts. Together with network structure, innovation frequency and  
336 transmission biases may fundamentally alter the transmission dynamics – for example, conformity  
337 overrides pay-off biases [21,36] and homophily reduces social connectivity [18,37] – fuelling  
338 evolutionary feedbacks between network structure and cultural evolution [22]. Both factors will  
339 therefore alter the resulting transmission networks, potentially restricting spread of new cultural  
340 traits and slowing recombinatory CCE. More than highlighting the intricate, yet nuanced,

341 interplay between demography and cultural transmission, our work strengthens our emerging  
342 understanding that realised connectivity, rather than network architecture, is important for CCE  
343 [2,3].

344

## 345 **Materials and Methods**

346

### 347 *Networks*

348

349 We generated six architectures of binary social networks in which nodes represent individuals  
350 linked by social relationships: (i) small-world networks, using the Watts-Strogatz model [23] with  
351 node degree  $K$  links; (ii) random networks, by randomly connecting nodes ensuring all nodes had  
352 the same degree  $K$ ; (iii) lattices, by placing nodes on a grid and connecting each to its  $K$  nearest  
353 neighbours; (iv) modular networks, by assigning nodes into nine modules, randomly connecting  
354 each to  $K-1$  nodes from the same module and one node from another module; (v) modular lattices,  
355 as per modular networks, but where the connections within modules were lattices; and (vi)  
356 multilevel networks, as per modular lattices, but assigning nodes into three sets of three modules,  
357 and connecting each to  $K-2$  nodes within their module, one node from each module from within its  
358 set and one node from a module outside of it. We generated networks with different sizes  
359 ( $N \in \{64,144,324\}$  nodes), and densities of connections (in which  $K \in \{8,12,18,24,30\}$  average links).  
360 We used these population sizes because they allowed us to partition the network into equally-  
361 sized clusters composed of equally-sized groups in which all individuals had the same degree, and  
362 in which connectivity was greater within groups and within clusters than between groups and  
363 between clusters.

364

### 365 *Network metrics*

366

367 Although all networks had comparable sizes and densities (i.e. the proportion links), the six  
368 architectures varied in levels and combinations of clustering coefficient and modularity.  
369 Clustering,  $C$ , informs the tendency of connected nodes to share the same connections with other



370 nodes, while modularity,  $Q$ , informs the tendency of the nodes to be organized into cohesive  
371 subsets that are more connected to each other than to the rest of the network [38].

372

373 *Simulations*

374

375 Our first agent-based model (model 1) followed Migliano et al. [19]. All agents were initialized  
376 with an inventory of three items from each of two lineages. In each simulation round (epoch), each  
377 focal agent was selected once, at random, and a partner randomly chosen from its social network  
378 connections. These agents combined one or two items from their inventory in proportion to their  
379 value into a triad of items. If this triad was a valid product, knowledge of that product was  
380 learned, spread immediately to all their network connections (one-to-many diffusion), and  
381 subsequently became available as an ingredient for making new products. Simulations finished  
382 once a recombination product (a triad that recombines specific products from both lineages) was  
383 first innovated. We ran 5,000 simulations for each of the network architecture types, sizes and  
384 densities of connections, recording time to achieve the recombination product (in epochs) and  
385 diversity of innovations in each epoch. An epoch was one simulation round in which each agent  
386 was selected once as a focal agent in random order.

387

388 Our second agent-based model (model 2) extended the first by changing the transmission  
389 mechanic and altering the set of valid combinations such that the model can run past the first  
390 innovation of either recombination product. Transmission of valid products now occurred  
391 between dyads of agents (one-to-one diffusion) prior to choosing items from their inventory, in  
392 contrast to the broadcast style of diffusion in model 1. Secondly, if a triad contained either  
393 recombination products, the final product was that recombination product. In the case where both  
394 recombination products were present in the triad, one was chosen as the final product at random.  
395 This allowed us to track the diffusion of recombination products beyond their innovation. We also  
396 ran 5,000 simulations for the same parameter space of model 1, recording time to recombination  
397 and time to diffusion to the majority of the network (in epochs). We implemented the agent-based  
398 models in R and Python. The code to generate the social networks, perform the simulations, the  
399 statistical analyses and the figures are available at [39]

400

401 *Data analyses*

402

403 To compare the performance of agents organized in different network architectures, we used time-  
404 to-event (survival) analyses [40] where time to recombination was a function of architecture and  
405 connectivity. For each population size, we used the Cumulative Incidence Function to estimate the  
406 proportion of simulations in which agents reached the recombination of each cultural lineage's  
407 products into a final high-payoff product. We used the non-parametric Kaplan-Meier product  
408 limit estimator to represent the time intervals based on observed recombination events from 5,000  
409 simulations from model 1, calculating 95% confidence intervals with the Greenwood estimator. To  
410 measure variance in time to recombination across population sizes, we measured the quartile  
411 coefficient of dispersion ( $QCD=(Q3-Q1)/(Q3+Q1)$ ), as this variable is not normally distributed and  
412 QCD offers a more robust measure.

413

414 While statistics are not typically performed on data from agent-based models since the posterior is  
415 directly sampled, we wanted to quantify the relative contributions of architecture, size and  
416 connectivity without the cumbersome descriptions of the entire distribution (which can be readily  
417 seen in **Fig. 2**). For both models 1 and 2, we created three sets of generalized linear models (GLMs)  
418 that predicted logged time to recombination (in epochs). Time to recombination was logged to  
419 account for non-normality of residuals, and to make comparisons more fair by bringing the mean  
420 closer to the median of the distribution. All models used log link function, as the data was non-  
421 linear conditional on predictors, even after the log transformation. Also, the log link function  
422 allowed the presentation of exponentiated coefficients, which simplify the comparison to the  
423 reference (here, the random networks at the GLM intercept). The first set of GLMs used a full  
424 interaction structure to partition the relative contributions of architecture, size and connectivity to  
425 average time to recombination (**Table S1**), excluding fully connected networks. To then compare  
426 fully connected networks to all other networks, we built a GLM using architecture and population  
427 size as predictors in a full interaction structure (**Table S2**). Connectivity was excluded as a  
428 predictor, as all fully connected networks only have 1 possible degree ( $K=N-1$ ). Finally, to compare  
429 differences between architectures in **Fig. 3** more precisely, we subset data by connectivity and

430 population size and performed a GLM with only architecture as a predictor for each subset, again  
431 excluding fully connected networks. We performed all data analyses in R [41], using ‘survival’ [42]  
432 and ‘survminer’ [43] packages.

433

#### 434 **Competing interests**

435

436 The authors have no competing interests with this study

437

#### 438 **Acknowledgments**

439

440 We thank the Social Evolutionary Ecology Lab and the Cognitive and Cultural Ecology Lab for the  
441 discussion that inspired this manuscript. This work was funded by the Max Planck Society. DRF  
442 and DP were funded by a grant from the European Research Council (ERC) under the European  
443 Union’s Horizon 2020 research and innovation programme (grant agreement No. 850859),  
444 awarded to DRF. LMA was funded by a Max Planck Independent Group Leader Fellowship. PH  
445 was funded by a scholarship from the China Scholarship Council (No. 201706100183). M.C. was  
446 funded by CAPES (88881.170254/2018-01). This work was supported by the Max Planck Society,  
447 and the Advanced Centre for Collective Behaviour, funded by the Deutsche  
448 Forschungsgemeinschaft (DFG, German Research Foundation) under Germany's Excellence  
449 Strategy (EXC 2117-422037984).

450

#### 451 **References**

452

- 453 1. M. Tomasello, The human adaptation for culture. *Annual Rev. Anthropol.* **28(1)**, 509-529 (1999).
- 454 2. A. Mesoudi, A. Thornton, What is cumulative cultural evolution? *Proc. R. Soc. B.* **285(1880)**,  
455 20180712 (2018).
- 456 3. M. Derex, A. Mesoudi, Cumulative cultural evolution within evolving population structures.  
457 *Trends Cogn. Sci.* (In press).
- 458 4. R. Boyd, P.J. Richerson, *The origin and evolution of cultures*. Oxford University Press, Oxford  
459 (2005).

- 460 5. R. Boyd, P.J. Richerson, J. Henrich, The cultural niche: Why social learning is essential for  
461 human adaptation. *Proc. Natl. Acad. Sci.* **108**, 10918–10925 (2011).
- 462 6. S. Shennan, Demography and cultural innovation: a model and its implications for the  
463 emergence of modern human culture. *Cambridge Arch. J.* **11(1)**:5-16 (2001).
- 464 7. J. Henrich, Demography and cultural evolution: How adaptive cultural processes can produce  
465 maladaptive losses – the Tasmanian case. *Am. Antiq.* **69(2)**, 197–214 (2004).
- 466 8. A. Powell, S. Shennan, M.G. Thomas, Late Pleistocene demography and the appearance of  
467 modern human behavior. *Science* **324(5932)**, 1298–1301 (2009).
- 468 9. M. Derex, M.-P. Beugin, B. Godelle, M. Raymond, Experimental evidence for the influence of  
469 group size on cultural complexity. *Nature* **503(7476)**, 389–391 (2013).
- 470 10. N. Fay, N. de Kleine, B. Walker, C.A. Caldwell, Increasing population size can inhibit  
471 cumulative cultural evolution. *Proc. Natl. Acad. Sci.* **116(14)**, 6726–6731 (2019).
- 472 11. J. P. Martens, Scenarios where increased population size can enhance cumulative cultural  
473 evolution are likely common. *Proc. Natl. Acad. Sci.* **116(35)**, 17160–17160 (2019).
- 474 12. M. Derex, R. Boyd, Partial connectivity increases cultural accumulation within groups. *Proc.*  
475 *Natl. Acad. Sci.* **113(11)**, 2982–2987 (2016).
- 476 13. R. Baldini, Revisiting the effect of population size on cumulative cultural evolution. *J. Cogn.*  
477 *Cult.* **15(3-4)**, 320–336 (2015).
- 478 14. M. Derex, C. Perreault, R. Boyd, Divide and conquer: intermediate levels of population  
479 fragmentation maximize cultural accumulation. *Phil. Trans. R. Soc. B* **373(1743)**, 20170062 (2018).
- 480 15. J. Henrich, R. Boyd, M. Derex, M.A Kline, A. Mesoudi, M. Muthukrishna, A.T. Powell, S.J.  
481 Shennan, M.G. Thomas, Understanding cumulative cultural evolution. *Proc. Natl. Acad. Sci.*  
482 **113(44)**, E6724–E6725 (2016).
- 483 16. B. Voelkl, R. Nöe, The influence of social structure on the propagation of social information in  
484 artificial primate groups: a graph-based simulation approach. *J. Theor. Biol.* **252(1)**, 77–86 (2008)
- 485 17. C.L. Nunn, P.H. Thrall, K. Bartz, T. Dasgupta, C. Boesch, Do transmission mechanisms or social  
486 systems drive cultural dynamics in socially structured populations? *An. Behav.* **77(6)**, 1515–1524  
487 (2009).
- 488 18. M. Cantor, H. Whitehead, The interplay between social networks and culture: theoretically and  
489 among whales and dolphins. *Phil. Trans. R. Soc. B* **368(1618)**, 20120340 (2013).

- 490 19. A.B. Migliano, F. Battiston, S. Viguier, A.E. Page, M. Dyble, R. Schlaepfer, D. Smith, L. Astete,  
491 M. Ngales, J. Gomez-Gardenes, V. Latora, Hunter-gatherer multilevel sociality accelerates  
492 cumulative cultural evolution. *Science Adv.* **6(9)**, p.eaax5913 (2020).
- 493 20. H. Whitehead, D. Lusseau, Animal social networks as substrate for cultural behavioural  
494 diversity. *J. Theor. Biol.* **294**,19-28 (2012).
- 495 21. L.M. Aplin, D.R. Farine, J. Morand-Ferron, A. Cockburn, A. Thornton, B.C. Sheldon,  
496 Experimentally induced innovations lead to persistent culture via conformity in wild birds.  
497 *Nature* **518(7540)**, 538-541 (2015).
- 498 22. M., Smolla, E. Akçay, Cultural selection shapes network structure. *Sci. Adv.* **5(8)**, eaaw0609  
499 (2019).
- 500 23. D.J. Watts, S.H. Strogatz, Collective dynamics of 'small-world' networks. *Nature* **393(6684)**, 440-  
501 442 (1998)
- 502 24. J.A. Firth, B.C. Sheldon, Social carry-over effects underpin trans-seasonally linked structure in a  
503 wild bird population. *Ecol. Lett.* **19(11)**, 1324-1332 (2016).
- 504 25. J.P. Hailman, M.S. Ficken. Combinatorial animal communication with computable syntax:  
505 chick-a-dee calling qualifies as 'language' by structural linguistics. *Am. Behav* **34**, 1899-1901  
506 (1986).
- 507 26. L.L. Bloomfield, I. Charrier, C.B. Sturdy, Note types and coding in parid vocalizations. II: The  
508 chick-a-dee call of the Mountain Chickadee (*Poecile gambeli*). *Can. J. Zool.* **82**, 780-793 (2004).
- 509 27. D.E. Kroodsma, Winter Wren singing behavior: a pinnacle of song complexity. *Condor* **82**, 357-  
510 365 (1980).
- 511 28. D.W. Leger, First Documentation of combinatorial song syntax in a suboscine passerine  
512 species. *Condor* **107(4)**, 765-774 (2005).
- 513 29. C.L. Branch, V.V. Pravosudov, Mountain chickadees from different elevations sing different  
514 songs: acoustic adaptation, temporal drift or signal of local adaptation?. *R. Soc. Open Sci* **2.4**,  
515 150019 (2015).
- 516 30. L. M. Aplin, Culture and cultural evolution in birds: a review of the evidence. *Anim. Behav.* **147**,  
517 179-187 (2019).
- 518 31. A. Whiten, Cultural evolution in animals. *Ann. Rev. Ecol. Evol. System.* **50**, 27-48 (2019).

- 519 32. D.J. Watts, A simple model of global cascades on random networks. *Proc. Natl. Acad. Sci.* **99(9)**,  
520 5766-5771 (2002).
- 521 33. C.L. Apicella, F.W. Marlowe, J.H. Fowler, N.A. Christakis, Social networks and cooperation in  
522 hunter-gatherers. *Nature* **481(7382)**, 497-501 (2012).
- 523 34. B.J. West, G.F. Massari, G. Culbreth, R. Failla, M. Bologna, R.I.M. Dunbar, P. Grigolini, Relating  
524 size and functionality in human social networks through complexity. *Proc. Natl. Acad. Sci.*  
525 **117(31)**, 18355-18358 (2020).
- 526 35. R.I.M. Dunbar, Structure and function in human and primate social networks: implications for  
527 diffusion, network stability and health. *Proc. R. Soc. A* **476**:20200446 (2020).
- 528 36. K.K. Denton, Y. Ram, U. Liberman, M.W. Feldman, Cultural evolution of conformity and  
529 anticonformity. *Proc. Natl. Acad. Sci.* (In press).
- 530 37. M. McPherson, L. Smith-Lovin, J.M. Cook, Birds of a feather: Homophily in social networks.  
531 *Annual Review of Sociology*, **27(1)**, 415-444 (2001).
- 532 38. M. Newman, *Networks*. Oxford University Press (2018).
- 533 39. M. Cantor, M. Chimento, S.Q. Smeele, P. He, D. Papageorgiou, L.M. Aplin, D.R. Farine. 2020.  
534 Social network architecture and the tempo of cumulative cultural evolution. Github repository.  
535 [https://github.com/simeonqs/Social\\_network\\_architecture\\_and\\_the\\_tempo\\_of\\_cumulative\\_c](https://github.com/simeonqs/Social_network_architecture_and_the_tempo_of_cumulative_cultural_evolution)  
536 [ultural\\_evolution](https://github.com/simeonqs/Social_network_architecture_and_the_tempo_of_cumulative_cultural_evolution)
- 537 40. R.G. Miller Jr, *Survival analysis* (Vol. 66). John Wiley & Sons (2011).
- 538 41. R Core Team. R: A language and environment for statistical computing. R Foundation for  
539 Statistical Computing, Vienna, Austria. URL <https://www.R-project.org/> (2019).
- 540 42. T. Therneau, A Package for Survival Analysis in R. R package version 3.2-3, [https://CRAN.R-](https://CRAN.R-project.org/package=survival)  
541 [project.org/package=survival](https://CRAN.R-project.org/package=survival) (2020)
- 542 43. A. Kassambara, M. Kosinski, P. Biecek, Survminer: Drawing Survival Curves using 'ggplot2'. R  
543 package version 0.4.7. <https://CRAN.R-project.org/package=survminer> (2020)

544 **Supporting Material for:**

545 **Social network architecture and the tempo of cumulative cultural evolution**

546 Mauricio Cantor\*, Michael C. Chimento, Simeon Q. Smeele, Peng He, Danai Papageorgiou,

547 Lucy M. Aplin\*, Damien R. Farine

548

549 **Corresponding Authors:** \* Mauricio Cantor. Department for the Ecology of Animal Societies, Max

550 Planck Institute of Animal Behavior, Am Obstberg 1, Radolfzell 78315, Germany; \* Lucy M. Aplin.

551 Cognitive & Cultural Ecology Research Group, Max Planck Institute of Animal Behavior, Am Obstberg

552 1, Radolfzell 78315, Germany, Phone: +49 7732 1501-13. **Emails:** mcantor@ab.mpg.de,

553 laplin@ab.mpg.de

554

555 **Table S1.** Generalized linear models (GLMs) for agent-based model 1 (with one-to-many  
 556 diffusion mechanism) and model 2 (one-to-one diffusion), in which time to recombination  
 557 (time to recombination, measured as  $\log(\text{epoch}+1)$ ) is predicted by an interaction between  
 558 population size and architecture. Coefficients and standard errors are exponentiated, as these  
 559 GLMs used a log link function. Connectivity was not included, as this contains the same  
 560 information as population size for fully connected networks. Intercepts represents random  
 561 networks of population size  $N=64$ . (\* $p<0.1$ ; \*\* $p<0.05$ ; \*\*\* $p<0.01$ )

562

|                                  | model1   |             | model2   |             |
|----------------------------------|----------|-------------|----------|-------------|
|                                  | Estimate | P-value     | Estimate | P-value     |
| Constant                         | 3.425*** | -0.003      | 4.205*** | -0.002      |
| graphsmall_world                 | 0.999*** | -0.004      | 1.003*** | -0.002      |
| graphlattice                     | 1.010*** | -0.004      | 1.013*** | -0.002      |
| graphmodular                     | 0.970*** | -0.004      | 0.994*** | -0.002      |
| graphmodular_lattice             | 0.972*** | -0.004      | 0.991*** | -0.002      |
| graphmultilevel                  | 0.977*** | -0.004      | 0.982*** | -0.002      |
| graphfull                        | 1.652*** | -0.003      | 1.033*** | -0.003      |
| pop_size144                      | 0.715*** | -0.004      | 0.759*** | -0.002      |
| pop_size324                      | 0.512*** | -0.004      | 0.587*** | -0.003      |
| graphsmall_world:pop_size144     | 0.999*** | -0.005      | 0.999*** | -0.003      |
| graphlattice:pop_size144         | 0.996*** | -0.005      | 0.989*** | -0.003      |
| graphmodular:pop_size144         | 1.013*** | -0.005      | 0.996*** | -0.003      |
| graphmodular_lattice:pop_size144 | 0.999*** | -0.005      | 1.003*** | -0.003      |
| graphmultilevel:pop_size144      | 1.024*** | -0.005      | 1.011*** | -0.003      |
| graphfull:pop_size144            | 1.206*** | -0.005      | 0.994*** | -0.005      |
| graphsmall_world:pop_size324     | 1.005*** | -0.006      | 0.997*** | -0.004      |
| graphlattice:pop_size324         | 1.012*** | -0.006      | 0.986*** | -0.004      |
| graphmodular:pop_size324         | 1.059*** | -0.006      | 1.001*** | -0.004      |
| graphmodular_lattice:pop_size324 | 1.036*** | -0.006      | 1.006*** | -0.004      |
| graphmultilevel:pop_size324      | 1.100*** | -0.006      | 1.015*** | -0.004      |
| graphfull:pop_size324            | 1.406*** | -0.006      | 0.980*** | -0.005      |
| Observations                     |          | 345,000     |          | 345,000     |
| Log Likelihood                   |          | -446,718.40 |          | -378,097.40 |
| Akaike Information Criterion     |          | 893,478.70  |          | 756,236.80  |

563



564 **Table S2.** Generalized linear models (GLMs) for agent-based model 1 (with one-to-many  
 565 diffusion mechanism) and model 2 (one-to-one diffusion), in which time to recombination  
 566 (time to recombination, measured as  $\log(\text{epoch}+1)$ ) is predicted by an interaction between  
 567 population size, network architecture, and connectivity (i.e. average network degree).  
 568 Coefficients and standard errors are exponentiated, as these GLMs used a log link function.  
 569 Full networks were excluded. Intercepts represent random networks of population size  $N=64$ ,  
 570 average degree of  $K=8$ . (\* $p<0.1$ ; \*\* $p<0.05$ ; \*\*\* $p<0.01$ )  
 571

|                                           | model1   |         | model2   |         |
|-------------------------------------------|----------|---------|----------|---------|
|                                           | Estimate | p-value | Estimate | p-value |
| Constant                                  | 3.196*** | -0.004  | 4.168*** | -0.002  |
| graphsmall_world                          | 0.999*** | -0.005  | 1.009*** | -0.003  |
| graphlattice                              | 1.010*** | -0.005  | 1.011*** | -0.003  |
| graphmodular                              | 1.005*** | -0.005  | 1.006*** | -0.003  |
| graphmodular_lattice                      | 1.011*** | -0.005  | 1.004*** | -0.003  |
| graphmultilevel                           | 1.020*** | -0.005  | 0.993*** | -0.003  |
| pop_size144                               | 0.724*** | -0.007  | 0.756*** | -0.004  |
| pop_size324                               | 0.618*** | -0.007  | 0.595*** | -0.005  |
| degree12                                  | 1.143*** | -0.005  | 1.018*** | -0.003  |
| degree18                                  | 0.847*** | -0.01   | 0.996*** | -0.006  |
| degree24                                  | 0.831*** | -0.01   | 0.995*** | -0.006  |
| degree30                                  | 0.856*** | -0.01   | 0.992*** | -0.006  |
| graphsmall_world:pop_size144              | 0.997*** | -0.009  | 0.992*** | -0.006  |
| graphlattice:pop_size144                  | 1.007*** | -0.009  | 0.989*** | -0.006  |
| graphmodular:pop_size144                  | 0.973*** | -0.009  | 0.998*** | -0.006  |
| graphmodular_lattice:pop_size144          | 0.942*** | -0.009  | 1.008*** | -0.006  |
| graphmultilevel:pop_size144               | 0.967*** | -0.009  | 1.014*** | -0.006  |
| graphsmall_world:pop_size324              | 1.004*** | -0.01   | 0.987*** | -0.007  |
| graphlattice:pop_size324                  | 1.021*** | -0.01   | 0.988*** | -0.007  |
| graphmodular:pop_size324                  | 0.930*** | -0.011  | 0.993*** | -0.007  |
| graphmodular_lattice:pop_size324          | 0.876*** | -0.011  | 0.996*** | -0.007  |
| graphmultilevel:pop_size324               | 0.955*** | -0.01   | 1.005*** | -0.007  |
| graphsmall_world:degree12                 | 0.999*** | -0.007  | 0.987*** | -0.005  |
| graphlattice:degree12                     | 1.000*** | -0.007  | 1.004*** | -0.005  |
| graphmodular:degree12                     | 0.934*** | -0.007  | 0.976*** | -0.005  |
| graphmodular_lattice:degree12             | 0.928*** | -0.007  | 0.974*** | -0.005  |
| graphmultilevel:degree12                  | 0.922*** | -0.007  | 0.978*** | -0.005  |
| graphsmall_world:degree18                 | 1.002*** | -0.014  | 1.003*** | -0.008  |
| graphlattice:degree18                     | 0.996*** | -0.013  | 0.997*** | -0.008  |
| graphmodular:degree18                     | 1.131*** | -0.014  | 0.988*** | -0.008  |
| graphmodular_lattice:degree18             | 1.170*** | -0.014  | 0.996*** | -0.008  |
| graphmultilevel:degree18                  | 1.130*** | -0.013  | 0.998*** | -0.008  |
| graphsmall_world:degree24                 | 1.005*** | -0.014  | 1.002*** | -0.008  |
| graphlattice:degree24                     | 0.992*** | -0.014  | 1.003*** | -0.008  |
| graphmodular:degree24                     | 1.163*** | -0.014  | 0.991*** | -0.008  |
| graphmodular_lattice:degree24             | 1.231*** | -0.014  | 0.996*** | -0.008  |
| graphmultilevel:degree24                  | 1.172*** | -0.013  | 0.995*** | -0.008  |
| graphsmall_world:degree30                 | 0.999*** | -0.014  | 1.006*** | -0.008  |
| graphlattice:degree30                     | 0.977*** | -0.013  | 1.000*** | -0.008  |
| graphmodular:degree30                     | 1.168*** | -0.013  | 0.996*** | -0.008  |
| graphmodular_lattice:degree30             | 1.237*** | -0.014  | 0.992*** | -0.008  |
| graphmultilevel:degree30                  | 1.175*** | -0.013  | 0.999*** | -0.008  |
| pop_size144:degree12                      | 0.864*** | -0.009  | 0.992*** | -0.006  |
| pop_size324:degree12                      | 0.796*** | -0.011  | 0.975*** | -0.007  |
| pop_size144:degree18                      | 1.251*** | -0.012  | 1.023*** | -0.007  |
| pop_size144:degree24                      | 1.426*** | -0.012  | 1.030*** | -0.007  |
| graphsmall_world:pop_size144:degree12     | 1.000*** | -0.013  | 1.014*** | -0.008  |
| graphlattice:pop_size144:degree12         | 0.989*** | -0.013  | 0.998*** | -0.008  |
| graphmodular:pop_size144:degree12         | 1.101*** | -0.013  | 1.017*** | -0.008  |
| graphmodular_lattice:pop_size144:degree12 | 1.134*** | -0.013  | 1.016*** | -0.008  |
| graphmultilevel:pop_size144:degree12      | 1.133*** | -0.013  | 1.016*** | -0.008  |
| graphsmall_world:pop_size324:degree12     | 0.999*** | -0.015  | 1.017*** | -0.01   |
| graphlattice:pop_size324:degree12         | 0.989*** | -0.015  | 0.995*** | -0.01   |
| graphmodular:pop_size324:degree12         | 1.125*** | -0.015  | 1.027*** | -0.01   |
| graphmodular_lattice:pop_size324:degree12 | 1.160*** | -0.016  | 1.030*** | -0.01   |
| graphmultilevel:pop_size324:degree12      | 1.154*** | -0.015  | 1.024*** | -0.01   |
| graphsmall_world:pop_size144:degree18     | 1.005*** | -0.017  | 1.000*** | -0.01   |

|                                           |             |        |             |       |
|-------------------------------------------|-------------|--------|-------------|-------|
| graphlattice:pop_size144:degree18         | 0.999***    | -0.017 | 1.006***    | -0.01 |
| graphmodular:pop_size144:degree18         | 0.907***    | -0.017 | 0.991***    | -0.01 |
| graphmodular_lattice:pop_size144:degree18 | 0.902***    | -0.017 | 0.977***    | -0.01 |
| graphmultilevel:pop_size144:degree18      | 0.921***    | -0.017 | 0.982***    | -0.01 |
| graphsmall_world:pop_size144:degree24     | 0.994***    | -0.017 | 0.997***    | -0.01 |
| graphlattice:pop_size144:degree24         | 0.981***    | -0.017 | 0.998***    | -0.01 |
| graphmodular:pop_size144:degree24         | 0.835***    | -0.017 | 0.981***    | -0.01 |
| graphmodular_lattice:pop_size144:degree24 | 0.794***    | -0.017 | 0.973***    | -0.01 |
| graphmultilevel:pop_size144:degree24      | 0.836***    | -0.017 | 0.977***    | -0.01 |
| Observations                              | 330,000     |        | 330,000     |       |
| Log Likelihood                            | -423,477.80 |        | -359,565.20 |       |
| Akaike Information Criterion              | 847,087.60  |        | 719,262.30  |       |

572

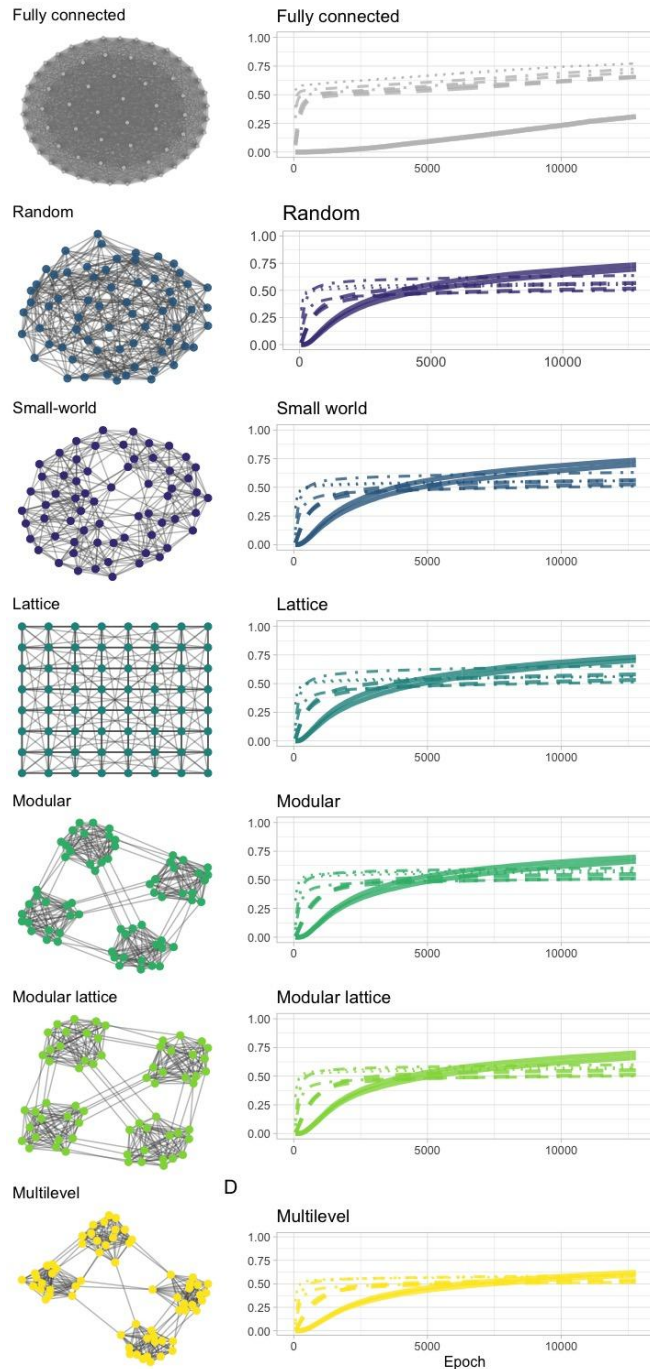

573

574 **Figure S1. Cultural trait diversity across social network architectures and proposed null**  
575 **models.** Comparison of the diversity of cultural traits along the network architecture  
576 spectrum, across populations of same size ( $N=64$  nodes) and connectivity (average degree  
577  $K=12$  links) in relative to a fully connected network of the same size ( $N=64$ ,  $K=63$ ). Cultural  
578 innovation diversity across network architectures measured as the proportion of the  
579 population with one of the four possible traits over time: a single inventory item (dotted  
580 lines), a single combination of two items (dashed and dotted lines), a valid combination of  
581 three items (triad; dashed lines), and a recombination product (a triad that recombines  
582 specific products from both lineages; thick lines). The inventory items came from two  
583 independent lineages, represented by lines of the same type.  
584
